# Supplementary material
Source: Springer Nature journal article supplement (https://www.springermedizin.de/resource/supplementary/12936_2008_770_MOESM3_ESM.pdf/9548626)
Supplement: MOESM3 [file 9548626]

'at-risk' villages

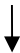

N=1081  
5.5% infected

November

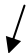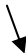

October, December

N=262  
2.7% infected

N=819  
6.3% infected

N=1855  
4.1% infected

'control' villages

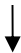

N=774  
2.2% infected
